# Supplementary material for: Lower Extremity Rehabilitation in Patients with Post-Stroke Sequelae through Virtual Reality Associated with Mirror Therapy
Source: PubMed Central journal article supplement (PMC7967355; doi:10.3390/ijerph18052654), 2021-03-06

*Lower extremity rehabilitation in patients with post-stroke sequelae through virtual reality associated with mirror therapy- supplementary file with Mirror Therapy and Virtual Reality exergames examples*

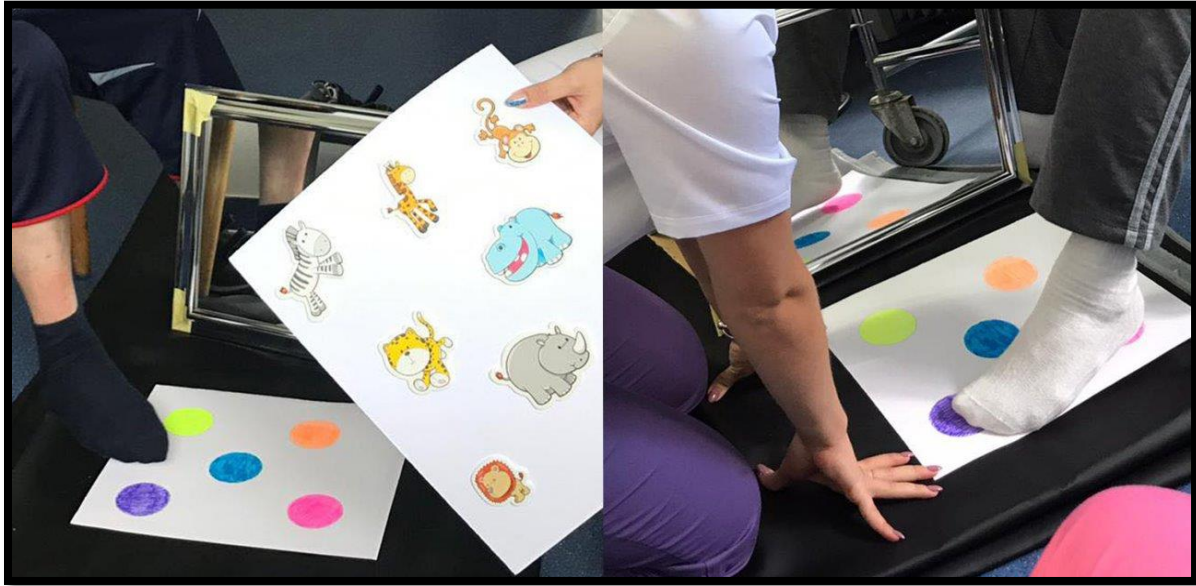

Exercise performed by Mirror Therapy

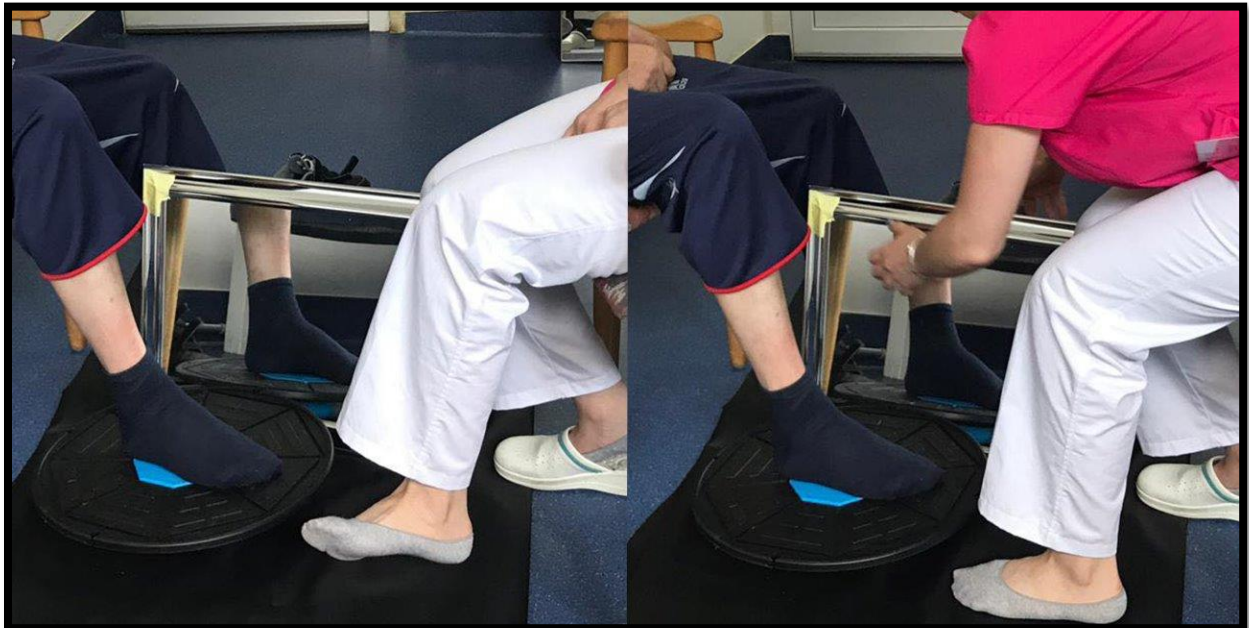

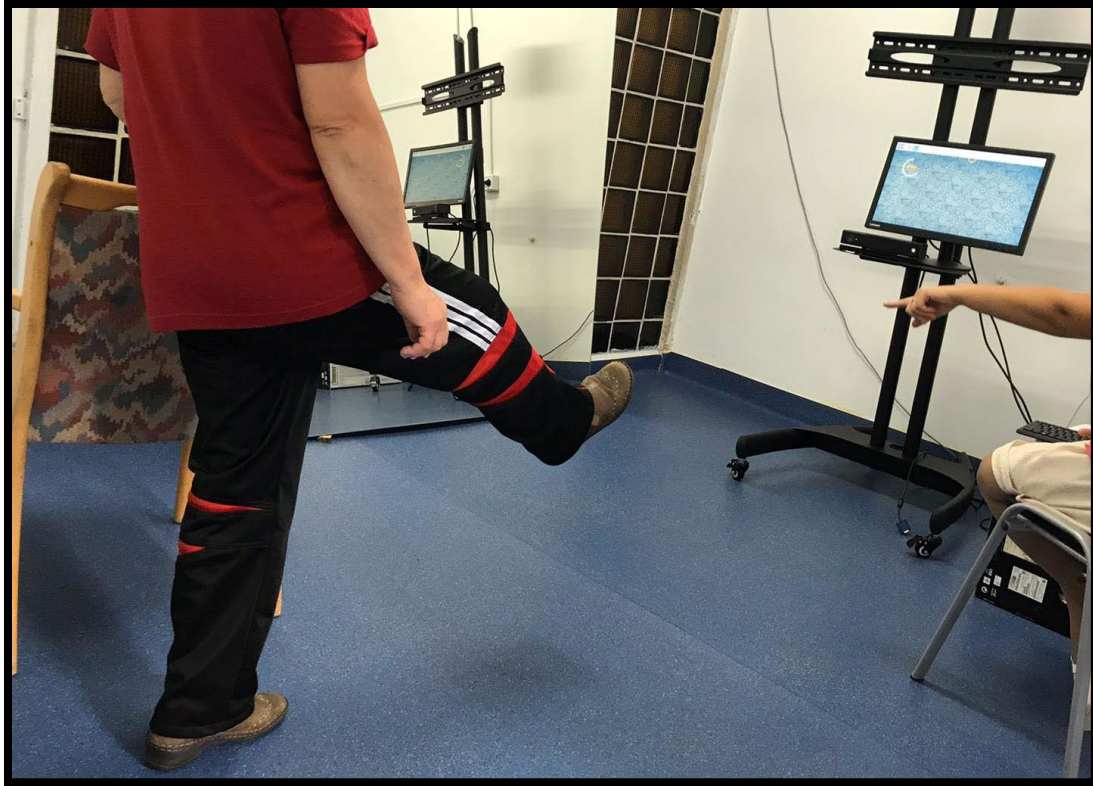

Exergame- Catch, where the patient shall move his LE randomly (left, right, up down) to „catch” with his foot the elements on screen.

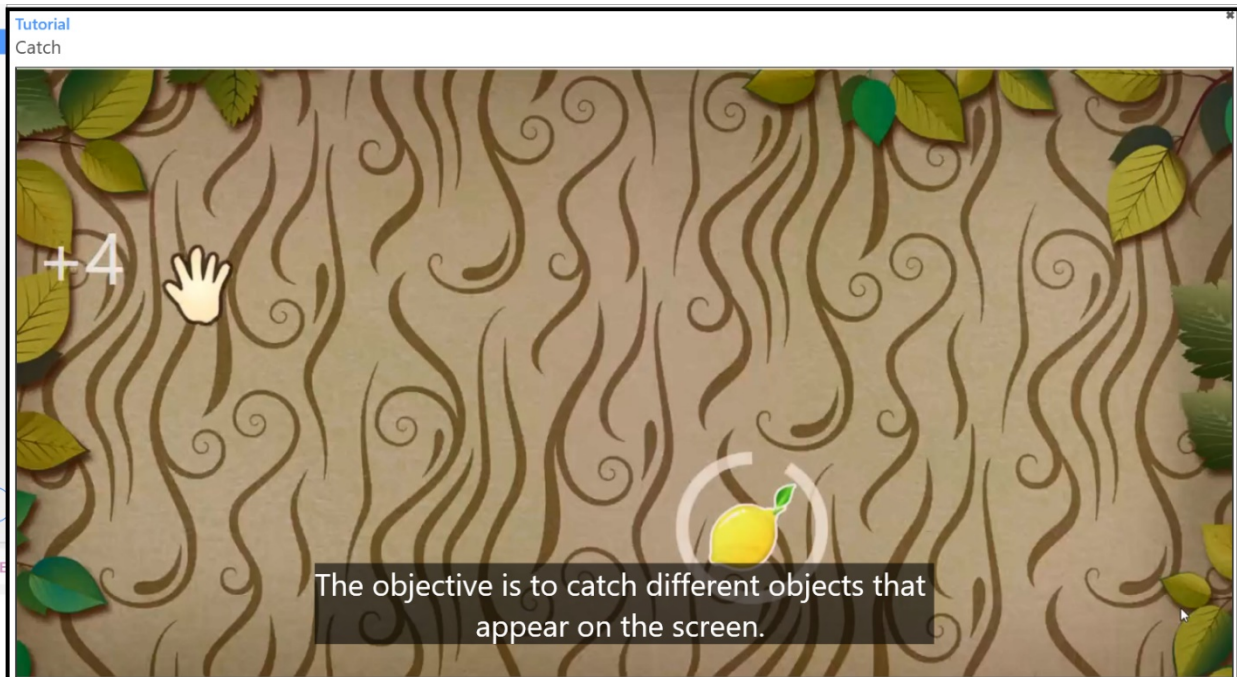



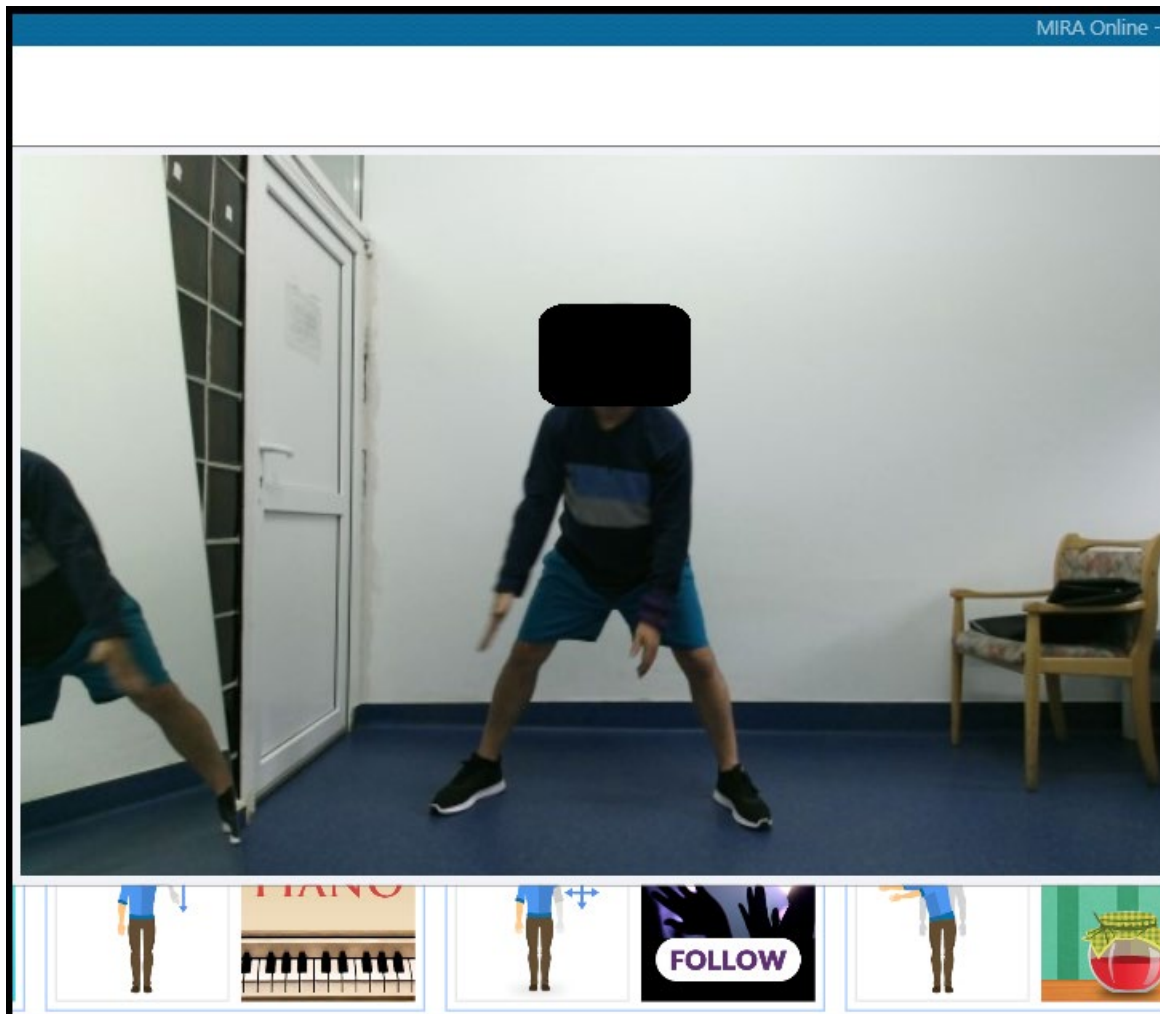

Exergame „Grab“, involves catching objects on shelves, with both hands and placing them on various levels and locations, without the patient detaching his feet from the floor.

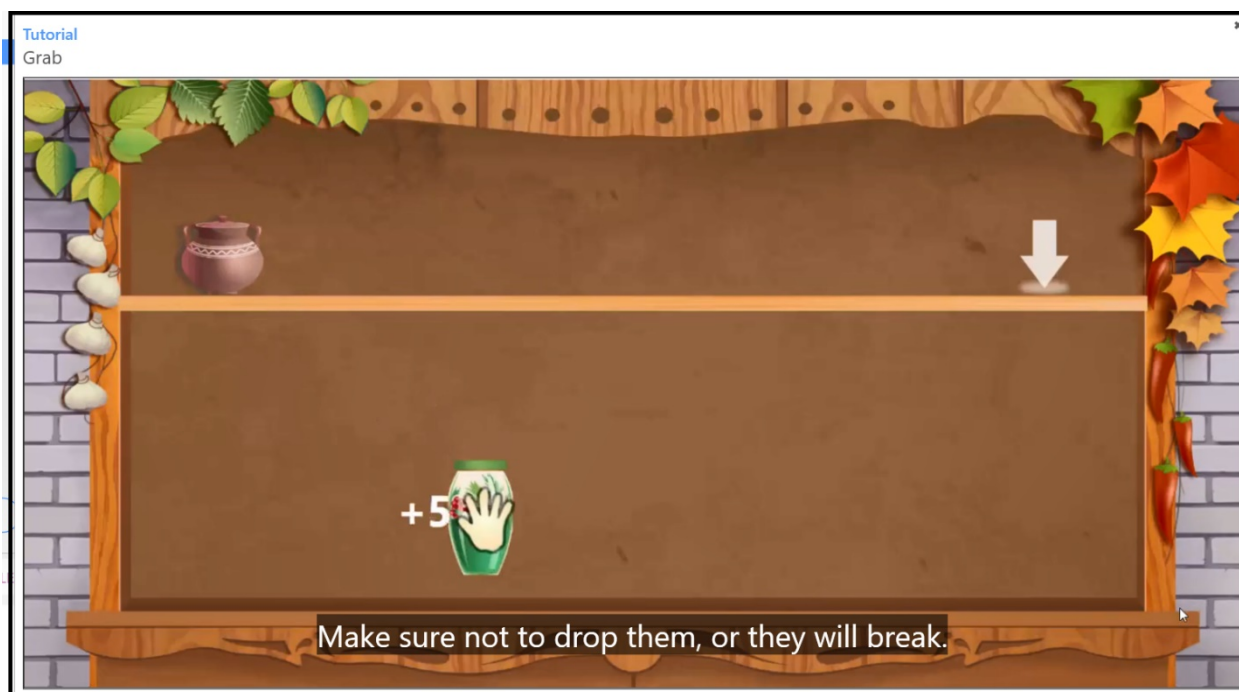

Supplement: ijerph-18-02654-s001.pdf [file ijerph-18-02654-s001.pdf]
